# Supplementary material for: Specific and Evolving Resting-State Network Alterations in Post-Concussion Syndrome Following Mild Traumatic Brain Injury
Source: PubMed Central journal article supplement (PMC3675039; doi:10.1371/journal.pone.0065470), 2013-06-06
Supplement: pone.0065470.s002.pdf [file pone.0065470.s002.pdf]

Table S1: The Rivermead Postconcussion Symptoms Questionnaire.

| <b>Symptoms</b>                 | <b>Controls</b> | <b>Subacute phase</b> |             | <b>Late phase</b> |             |
|---------------------------------|-----------------|-----------------------|-------------|-------------------|-------------|
|                                 |                 | <b>PCS-</b>           | <b>PCS+</b> | <b>PCS-</b>       | <b>PCS+</b> |
| Headaches                       | 0.18 (0.46)     | 1.40 (1.50)           | 2.20 (1.30) | 0.68 (1.20)       | 1.80 (1.40) |
| Feelings of dizziness           | 0 (0)           | 0.39 (0.86)           | 1.80 (1.40) | 0.05 (0.23)       | 0.88 (1.40) |
| Nausea and/or vomiting          | 0.03 (0.17)     | 0.21 (0.81)           | 1.10 (1.20) | 0.13 (0.66)       | 0.59 (1.00) |
| Noise sensitivity               | 0 (0)           | 0.61 (1.10)           | 2.10 (1.60) | 0.34 (0.85)       | 1.90 (1.60) |
| Sleep disturbance               | 0.26 (0.62)     | 1.40 (1.70)           | 2.70 (1.50) | 0.47 (1.00)       | 3.10 (1.20) |
| Fatigue. tiring more easily     | 0.41 (0.74)     | 1.40 (1.60)           | 3.10 (1.10) | 0.34 (0.85)       | 3.00 (1.10) |
| Being irritable. easily angered | 0.21 (0.73)     | 0.71 (1.20)           | 2.40 (1.30) | 0.24 (0.79)       | 1.90 (1.40) |
| Feeling depressed or tearful    | 0.06 (0.34)     | 0.61 (1.20)           | 1.90 (1.50) | 0.05 (0.23)       | 2.00 (1.40) |
| Feeling frustrated or impatient | 0.21 (0.54)     | 0.68 (1.20)           | 2.40 (1.50) | 0.11 (0.39)       | 2.10 (1.40) |
| Forgetfulness. poor memory      | 0.44 (0.86)     | 0.53 (1.00)           | 2.00 (1.30) | 0.32 (0.84)       | 1.80 (1.40) |
| Poor concentration              | 0.56 (0.89)     | 0.84 (1.20)           | 2.50 (1.20) | 0.53 (1.00)       | 1.90 (1.30) |
| Slowness                        | 0.12 (0.41)     | 0.39 (0.97)           | 1.80 (1.30) | 0.21 (0.62)       | 1.40 (1.30) |
| Blurred vision                  | 0.03 (0.17)     | 0.34 (0.97)           | 1.50 (1.60) | 0.13 (0.58)       | 1.20 (1.70) |
| Light sensitivity               | 0 (0)           | 0.26 (0.86)           | 1.60 (1.70) | 0.03 (0.16)       | 1.10 (1.50) |
| Double vision                   | 0 (0)           | 0 (0)                 | 0.76 (1.40) | 0 (0)             | 0.18 (0.73) |
| Restlessness                    | 0.03 (0.17)     | 0.05 (0.32)           | 1.20 (1.60) | 0 (0)             | 0.59 (1.10) |
