# Supplementary material for: Specific and Evolving Resting-State Network Alterations in Post-Concussion Syndrome Following Mild Traumatic Brain Injury
Source: PubMed Central journal article supplement (PMC3675039; doi:10.1371/journal.pone.0065470), 2013-06-06
Supplement: pone.0065470.s003.pdf [file pone.0065470.s003.pdf]

Table S2: Regions with significant group effects on basic and topological graph properties (uncorrected,  $p < 0.05$ ). Bold indicates significance at  $p < 1/N$ .

| <b>Brain regions</b>  |                                | <b>Subacute phase</b>                                                               |                                                                           |                                                            | <b>Late phase</b>                                 |                    |                                                             |
|-----------------------|--------------------------------|-------------------------------------------------------------------------------------|---------------------------------------------------------------------------|------------------------------------------------------------|---------------------------------------------------|--------------------|-------------------------------------------------------------|
|                       |                                | <b>PCS-/ctr</b>                                                                     | <b>PCS+/ctr</b>                                                           | <b>PCS+/PCS-</b>                                           | <b>PCS-/ctr</b>                                   | <b>PCS+/ctr</b>    | <b>PCS+/PCS-</b>                                            |
| <b>Frontal</b>        | Inferior frontal triangular, R |                                                                                     | $E_i$ 0.624                                                               |                                                            |                                                   |                    |                                                             |
|                       | Inferior frontal opercular, R  |                                                                                     |                                                                           |                                                            | $s$ 0.525<br>$k$ 0.508<br>$bc$ 0.492              |                    |                                                             |
|                       | Middle frontal, R              |                                                                                     | $d_e$ 0.652<br>$E_i$ <b>0.999</b>                                         |                                                            |                                                   | $E_i$ 0.647        |                                                             |
|                       | Middle frontal orbital, L      |                                                                                     |                                                                           |                                                            |                                                   | $E_i$ <b>0.871</b> |                                                             |
|                       | Middle frontal orbital, R      | $k$ 0.460                                                                           | $E_n$ 0.639                                                               |                                                            |                                                   |                    |                                                             |
|                       | Superior frontal, L            | $k$ -0.473<br>$bc$ -0.491                                                           |                                                                           |                                                            | $k$ <b>-0.597</b><br>$E_n$ <b>-0.697</b>          |                    | $k$ 0.659<br>$E_i$ <b>0.842</b><br>$E_n$ <b>0.736</b>       |
|                       | Superior frontal, R            |                                                                                     |                                                                           |                                                            |                                                   | $E_i$ <b>0.836</b> | $s$ 0.638<br>$k$ 0.680<br>$E_i$ 0.731<br>$E_n$ <b>0.735</b> |
|                       | Superior frontal orbital, R    |                                                                                     | $E_n$ 0.639                                                               |                                                            |                                                   |                    |                                                             |
|                       | Precentral, L                  |                                                                                     |                                                                           |                                                            |                                                   | $bc$ -0.699        | $s$ -0.664<br>$k$ <b>-0.762</b><br>$E_n$ -0.634             |
|                       | Rolandic operculum, L          |                                                                                     | $k$ -0.708<br>$E_n$ -0.619                                                | $E_n$ -0.619                                               |                                                   |                    |                                                             |
| Rolandic operculum, R |                                | $s$ <b>-0.804</b><br>$k$ <b>-1.041</b><br>$E_n$ <b>-1.013</b><br>$bc$ <b>-0.857</b> | $s$ -0.592<br>$k$ <b>-0.775</b><br>$E_n$ <b>-0.771</b><br>$bc$ -0.637     | $E_n$ -0.493                                               |                                                   | $E_i$ 0.698        |                                                             |
| <b>Limbic</b>         | Amygdala, R                    |                                                                                     | $bc$ 0.603                                                                | $bc$ 0.607                                                 |                                                   |                    |                                                             |
|                       | Anterior cingulum, R           |                                                                                     |                                                                           |                                                            |                                                   |                    | $E_i$ 0.673                                                 |
|                       | Middle cingulum, L             |                                                                                     |                                                                           |                                                            | $bc$ -0.474                                       | $bc$ <b>-0.873</b> |                                                             |
|                       | Middle cingulum, R             |                                                                                     | $E_i$ 0.582                                                               | $k$ 0.586                                                  |                                                   |                    | $k$ -0.606                                                  |
|                       | Hippocampus, L                 |                                                                                     |                                                                           |                                                            | $s$ -0.492<br>$k$ -0.540<br>$E_n$ <b>-0.580</b>   |                    | $bc$ 0.586                                                  |
|                       | Parahippocampus, L             |                                                                                     | $s$ -0.618<br>$k$ -0.593<br>$E_n$ -0.561                                  |                                                            | $s$ -0.476<br>$E_n$ -0.509                        |                    |                                                             |
|                       | Parahippocampus, R             |                                                                                     |                                                                           |                                                            | $s$ -0.634<br>$k$ -0.567<br>$E_n$ <b>-0.596</b>   |                    |                                                             |
| <b>Temporal</b>       | Heschl, R                      | $k$ -0.476                                                                          |                                                                           |                                                            | $k$ -0.556<br>$E_i$ <b>-0.606</b><br>$E_n$ -0.528 |                    |                                                             |
|                       | Superior temporal, L           |                                                                                     | $k$ -0.686<br>$E_n$ <b>-0.734</b>                                         | $k$ <b>-0.724</b><br>$E_n$ <b>-0.814</b>                   |                                                   |                    |                                                             |
|                       | Superior temporal, R           |                                                                                     | $E_i$ -0.663                                                              |                                                            |                                                   |                    |                                                             |
|                       | Superior temporal pole, L      |                                                                                     |                                                                           | $d_e$ -0.597<br>$k$ -0.696<br>$E_i$ -0.679<br>$E_n$ -0.574 |                                                   |                    |                                                             |
|                       | Middle temporal, L             |                                                                                     |                                                                           |                                                            |                                                   |                    | $bc$ 0.604                                                  |
|                       | Middle temporal, R             |                                                                                     |                                                                           |                                                            |                                                   |                    | $ed$ <b>-0.765</b><br>$k$ -0.600                            |
|                       |                                |                                                                                     |                                                                           |                                                            |                                                   |                    |                                                             |
| <b>Parietal</b>       | Postcentral, L                 |                                                                                     | $E_i$ -0.652                                                              | $E_i$ -0.512                                               |                                                   |                    |                                                             |
| <b>Occipital</b>      | Cuneus, R                      |                                                                                     | $k$ 0.670                                                                 | $k$ 0.605<br>$bc$ 0.576                                    |                                                   |                    |                                                             |
|                       | Lingual, L                     |                                                                                     | $s$ 0.654<br>$k$ 0.664<br>$bc$ <b>0.777</b>                               | $s$ 0.581<br>$k$ 0.619<br>$E_i$ 0.713<br>$bc$ 0.570        | $E_i$ -0.506                                      |                    | $E_i$ 0.628                                                 |
|                       | Lingual, R                     |                                                                                     | $s$ 0.649<br>$k$ 0.642                                                    |                                                            |                                                   |                    |                                                             |
| <b>Subcortical</b>    | Thalamus, L                    |                                                                                     | $E_i$ <b>0.823</b><br>$E_n$ <b>0.795</b>                                  |                                                            | $E_n$ 0.466                                       |                    |                                                             |
|                       | Thalamus, R                    | $E_i$ 0.612<br>$E_n$ 0.509                                                          | $s$ 0.666<br>$k$ <b>0.774</b><br>$E_i$ <b>0.927</b><br>$E_n$ <b>0.939</b> |                                                            | $s$ 0.473<br>$k$ <b>0.560</b><br>$E_n$ 0.519      |                    |                                                             |

**Abbreviations:** ctr, controls;  $d_e$ , edge diversity;  $E_i$ , local efficiency;  $E_n$ , nodal efficiency;  $k$ , degree; L, left; PCS, post-concussion syndrome; R, right;  $s$ , strength. Definition of basic ( $s$  and  $d_e$ ) and topographic ( $k$ ,  $E_i$ ,  $E_n$  and  $bc$ ) measures can be found in the subsection "Characteristics of brain network organization using graph theory" of the Materials and Methods section and in the supplementary information section, respectively.
